# Supplementary material for: Modification of Temperature Lapse Rates and Cloud Properties during a Spatiotemporally Extended Dust Aerosol Episode (16–18 June 2016) over the Mediterranean Basin Based on Satellite and Reanalysis Data
Source: MDPI journal article supplement (doi:10.3390/rs14030679), 2022-01-31
Supplement: s1 [file s1]

Archive with 1 entries (1 files):
- remotesensing-1537656-supplementary.pdf
